# Supplementary material for: Biological Applications of Synthetic Binders Isolated from a Conceptually New Adhiron Library
Source: MDPI journal article supplement (doi:10.3390/biom13101533), 2023-10-17
Supplement: s1 [file s1]

## Supplementary Information

**Figure S1.** Screening of anti-pea protoplast Adhiron by flow-cytometry

Examples of flow cytometry screening results obtained using anti-pea protoplast Adhiron (B01) in combination with anti-ALFAtag nanobodies fused to mRuby3. Overlapping red emission spectra of protoplasts only (orange), protoplasts + anti-ALFAtag-mRuby3 (black line) and protoplasts + anti-ALFAtag-mRuby3 in the presence of Adhiron clone (light blue) for both a negative (left) and a positive ligand (right).

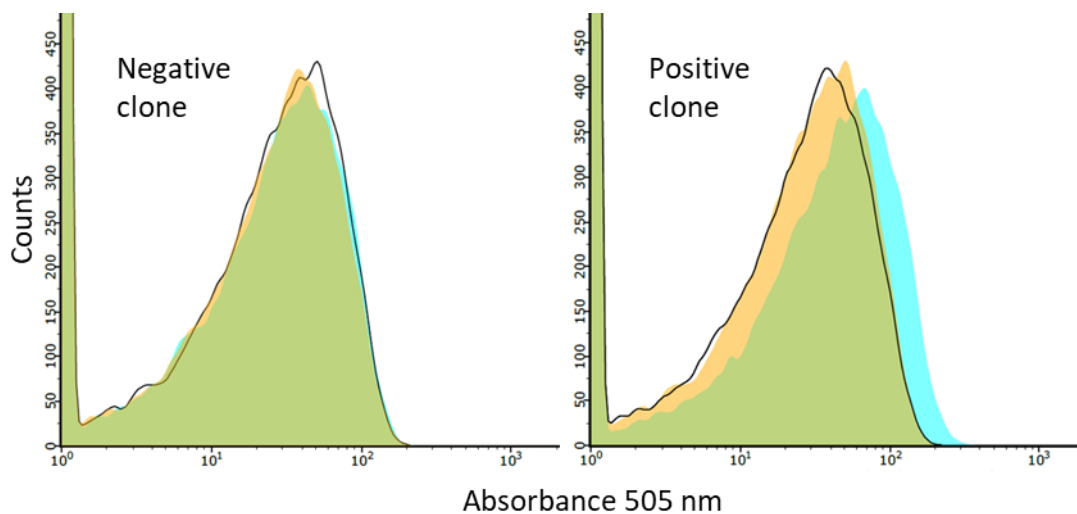

**Figure S2.** Unique sequences of anti-pea protoplast Adhiron

a) Each clone is represented by a code, its isoelectric point is reported, the variable regions are in green and the cysteines in red.

**A12, pI 6.30**

MATGVRAPVPGNENSLEIEELARFAVDEHNKKENALLEFVRVVKAKEQ**CIRGFCGGG**TMYYLTLEAKDGGKKKLYEA  
KVWVK**HIDHYIDYGN**FKELQEFKPVGDA

**B01, pI 5.87**

MATGVRAPVPGNENSLEIEELARFAVDEHNKKENALLEFVRVVKAKEQ**CIGGC**VGGGTMYYLTLEAKDGGKKKLYEA  
KVWVK**RFVCDNDCGN**FKELQEFKPVGDA

**B02, pI 6.58**

MATGVRAPVPGNENSLEIEELARFAVDEHNKKENALLEFVRVVKAKEQ**CIGGCCGGG**TMYYLTLEAKDGGKKKLYEA  
KVWVK**RSDCRSDCCN**FKELQEFKPVGDA

**E12, pI 6.60**

MATGVRAPVPGNENSLEIEELARFAVDEHNKKENALLEFVRVVKAKEQ**CIGGV**VGGGTMYYLTLEAKDGGKKKLYEA  
KVWVK**RVRDNDGGN**FKELQEFKPVGDA

b) CLUSTAL O (1.2.4) multiple sequence alignment of anti-protoplast Adhiron clones

Variable sequences are in red, cysteines are highlighted in blue.

```

B01      MATGVRVPGNENSLEIEELARFAVDEHNKKENALLEFVRVVKAKEQCIGGCVGGGTMYT      60
E12      MATGVRVPGNENSLEIEELARFAVDEHNKKENALLEFVRVVKAKEQCIGGVVGGGTMYT      60
A12      MATGVRVPGNENSLEIEELARFAVDEHNKKENALLEFVRVVKAKEQCIRGFCGGGTMYT      60
B02      MATGVRVPGNENSLEIEELARFAVDEHNKKENALLEFVRVVKAKEQCIGGCCGGGTMYT      60
          ***** * *****

B01      LTLEAKDGGKKKLYEAKVWVKRFVCDNDCNFKELQEFKPVGDA
E12      LTLEAKDGGKKKLYEAKVWVKRVVRDNDGGNFKELQEFKPVGDA
A12      LTLEAKDGGKKKLYEAKVWVKHIDHYIDYGNFKELQEFKPVGDA
B02      LTLEAKDGGKKKLYEAKVWVKRSDCRSDCNFKELQEFKPVGDA
          *****: * *****

```

Variable loops (1x1C, 1x2C, 1x4C, 1x6C)

**Figure S3.** Unique sequences of anti-CRP Adhiron clones

a) Each clone is represented by a code, its isoelectric point is reported, the variable regions are in green and the cysteines in red. Single framework mutations in G6 are in blue.

**A9, pI 9.10**

MATGVRVPGNENSLEIEELARFAVDEHNKKENALLEFVRVVKAKEQ**HIGVRNHY**TMYYLTLEAKDGGKKKLYEAKVWVVK**SVIHYYHFR**NFKELQEFKPVGDA

**B5, pI 6.74**

MATGVRVPGNENSLEIEELARFAVDEHNKKENALLEFVRVVKAKEQ**SIGVGFVN**TMYYLTLEAKDGGKKKLYEAKVWVVK**YVSHCYGDR**NFKELQEFKPVGDA

**E5, pI 9.13**

MATGVRVPGNENSLEIEELARFAVDEHNKKENALLEFVRVVKAKEQ**FHFNRHGL**TMYYLTLEAKDGGKKKLYEAKVWVVK**PLVRHKAYW**NFKELQEFKPVGDA

**E7, pI 9.42**

MATGVRVPGNENSLEIEELARFAVDEHNKKENALLEFVRVVKAKEQ**YRSGYRCH**TMYYLTLEAKDGGKKKLYEAKVWVVK**PVRWR****CGRQ**NFKELQEFKPVGDA

**E8, pI 9.49**

MATGVRVPGNENSLEIEELARFAVDEHNKKENALLEFVRVVKAKEQ**RKLLGVRF**LTMYLTLEAKDGGKKKLYEAKVWVVK**TRWDGRGGK**NFKELQEFKPVGDA

**F5, pI 9.21**

MATGVRVPGNENSLEIEELARFAVDEHNKKENALLEFVRVVKAKEQ**YIRHLYGIG**TMYYLTLEAKDGGKKKLYEAKVWVVK**AMCSGRRR**VNFKELQEFKPVGDA

### F11, pl 6.83

MATGVRAPVPGNENSLEIEELARFAVDEHNKKENALLEFVRVVKAKEQ**HDFFIY**CGITMYYLLEAKDGGKKKLYEAK  
VWVK**HYNFYVYRS**NFKELQEFKPVGDA

### G6, pl 4.73

MATGVRAPVPGNENS**ME**IEELARFAVDEHNKKENALLEFVRVVKAKEQ**SPDC**DEVATTMYYLLEAKDGGKK**EL**YE  
ADVWVK**PGSRSGSGD**NYK**EL**LEFKPVGDVA

### G8, pl 8.65

MATGVRAPVPGNENSLEIEELARFAVDEHNKKENALLEFVRVVKAKEQ**WTPRYHE**CGTMYYLLEAKDGGKKKLYE  
AKVWVK**RRDRYHLGS**NFKELQEFKPVGDA

### G9, pl 9.15

MATGVRAPVPGNENSLEIEELARFAVDEHNKKENALLEFVRVVKAKEQ**FHFSSYSRG**TMYYLLEAKDGGKKKLYEAK  
VWVK**PRTWWRSGGN**NFKELQEFKPVGDA

b) CLUSTAL O (1.2.4) multiple sequence alignment of anti-CRP Adhiron clones

Variable sequences are in red, cysteines are highlighted in blue.

|     |                                                                                          |    |
|-----|------------------------------------------------------------------------------------------|----|
| G6  | MATGVRAPVPGNENS <b>ME</b> IEELARFAVDEHNKKENALLEFVRVVKAKE <b>QSPDC</b> DEVATTMY <b>Y</b>  | 60 |
| G8  | MATGVRAPVPGNENSLEIEELARFAVDEHNKKENALLEFVRVVKAKE <b>QWTPRYHE</b> CGTMY <b>Y</b>           | 60 |
| E8  | MATGVRAPVPGNENSLEIEELARFAVDEHNKKENALLEFVRVVKAKE <b>QRKLLGV</b> RFLTMY <b>Y</b>           | 60 |
| F5  | MATGVRAPVPGNENSLEIEELARFAVDEHNKKENALLEFVRVVKAKE <b>QYIRHLYG</b> IGTMY <b>Y</b>           | 60 |
| E5  | MATGVRAPVPGNENSLEIEELARFAVDEHNKKENALLEFVRVVKAKE <b>QFHFNRHGL</b> FTMY <b>Y</b>           | 60 |
| G9  | MATGVRAPVPGNENSLEIEELARFAVDEHNKKENALLEFVRVVKAKE <b>QFHFSSYSRG</b> TMY <b>Y</b>           | 60 |
| E7  | MATGVRAPVPGNENSLEIEELARFAVDEHNKKENALLEFVRVVKAKE <b>QYRSGYR</b> CHRTMY <b>Y</b>           | 60 |
| F11 | MATGVRAPVPGNENSLEIEELARFAVDEHNKKENALLEFVRVVKAKE <b>QHDFFIY</b> CGITMY <b>Y</b>           | 60 |
| A9  | MATGVRAPVPGNENSLEIEELARFAVDEHNKKENALLEFVRVVKAKE <b>QHIGRVRNHY</b> TMY <b>Y</b>           | 60 |
| B5  | MATGVRAPVPGNENSLEIEELARFAVDEHNKKENALLEFVRVVKAKE <b>QSIGVG</b> FVNV <b>Y</b> TMY <b>Y</b> | 60 |
| G6  | LTLEAKDGGKKKLYEADVWVK <b>PGSRSGSGD</b> NYKELLEFKPVGDV                                    |    |
| G8  | LTLEAKDGGKKKLYEAKVWVK <b>RRDRYHLGS</b> NFKELQEFKPVGDA                                    |    |
| E8  | LTLEAKDGGKKKLYEAKVWVK <b>TRWDGRGGK</b> NFKELQEFKPVGDA                                    |    |
| F5  | LTLEAKDGGKKKLYEAKVWVK <b>AMC</b> <b>SGRRRV</b> NFKELQEFKPVGDA                            |    |
| E5  | LTLEAKDGGKKKLYEAKVWVK <b>PLVRHKAYW</b> NFKELQEFKPVGDA                                    |    |
| G9  | LTLEAKDGGKKKLYEAKVWVK <b>PRTWWRSGGN</b> NFKELQEFKPVGDA                                   |    |
| E7  | LTLEAKDGGKKKLYEAKVWVK <b>PVRWR</b> <b>GRQ</b> NFKELQEFKPVGDA                             |    |
| F11 | LTLEAKDGGKKKLYEAKVWVK <b>HYNFYVYRS</b> NFKELQEFKPVGDA                                    |    |
| A9  | LTLEAKDGGKKKLYEAKVWVK <b>SVIH</b> YHYFRNFKELQEFKPVGDA                                    |    |
| B5  | LTLEAKDGGKKKLYEAKVWVK <b>YVSH</b> <b>CYGD</b> RNFKELQEFKPVGDA                            |    |

Variable loops (4 no C, 5x1C, 1x2C)

**Figure S4.** CRP detection using an electrochemical impedance biosensor activated with the E7 Adhiron specific for the antigen

Top panel: Nyquist plots of the bare sensor (Au only), sensor plus CRP antigen (E7 only), and of the sensor functionalized with anti-CRP in the presence of CRP (CRP-E7) with its corresponding fit; Bottom panel: Cyclic voltammograms of bare sensor (blue), sensor plus CRP antigen (orange), and of the sensor functionalized with anti-CRP in the presence of CRP (red) at scan rate of 20 mV/s

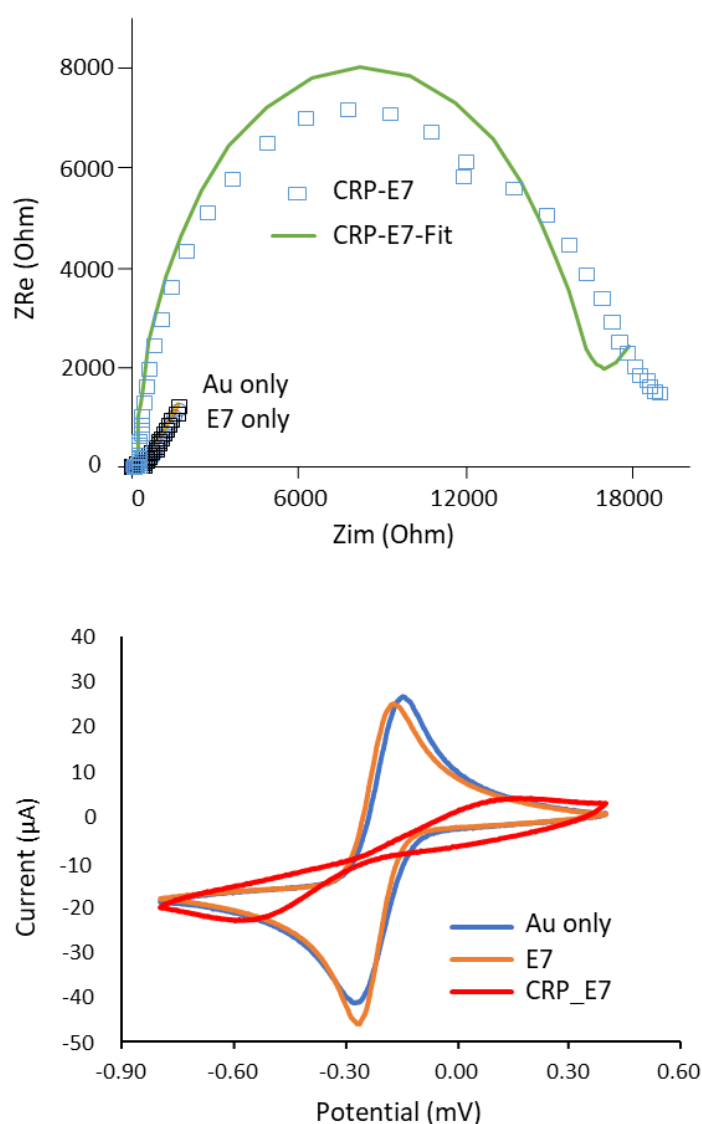

**Figure S5.** Unique sequences of Adhiron clones specific for SpyCatcher002

a) Each clone is represented by a code, its isoelectric point is reported, the variable regions are in green and the cysteines in red.

### B1, pl 9.13

MATGVRAPVPGNENSLEIEELARFAVDEHNKKENALLEFVRVVKAKEQ**NRR**IYLS**SH**FTMYYLTL**E**AKDGGKKKLYEAK  
VWVK**RAMP****SS**YFGNFKELQEFKPVGDAA

### H2, pl 7.77

MATGVRAPVPGNENSLEIEELARFAVDEHNKKENALLEFVRVVKAKEQ**LLG**TTV**Q****C**MTMYYLTL**E**AKDGGKKKLYEAK  
KVWVK**RI****C****ND****R****H****H****V**NFKELQEFKPVGDAA

### D6, pl 7.74

MATGVRAPVPGNENSLEIEELARFAVDEHNKKENALLEFVRVVKAKEQ**S****R****V****I****Y****V****L****W****F**TMYYLTL**E**AKDGGKKKLYEAK  
VWVK**H****D****S****I****C****C****N****R****I**NFKELQEFKPVGDAA

### F9, pl 5.92

MATGVRAPVPGNENSLEIEELARFAVDEHNKKENALLEFVRVVKAKEQ**N****R****L****I****Y****H****S****D****V**TMYYLTL**E**AKDGGKKKLYEAK  
VWVK**H****A****I****P****D****S****D****F****G**NFKELQEFKPVGDAA

### G5 pl 7.74

MATGVRAPVPGNENSLEIEELARFAVDEHNKKENALLEFVRVVKAKEQ**R****V****F****K****I****S****G****F****E**TMYYLTL**E**AKDGGKKKLYEAK  
VWVK**H****N****C****I****Y****R****D****C**NFKELQEFKPVGDAA

### B12 pl 7.74

MATGVRAPVPGNENSLEIEELARFAVDEHNKKENALLEFVRVVKAKEQ**K****D****F****N****V****F****G****G****E**TMYYLTL**E**AKDGGKKKLYEAK  
KVWVK**R****N****R****I****C****R****D****C**HNFKELQEFKPVGDAA

b) CLUSTAL O (1.2.4) multiple sequence alignment of anti-SpyCatcher clones

Variable sequences are in red, cysteines are highlighted in blue.

|     |                                                                                                                                       |       |
|-----|---------------------------------------------------------------------------------------------------------------------------------------|-------|
| B1  | MATGVRAPVPGNENSLEIEELARFAVDEHNKKENALLEFVRVVKAKEQ <b>NRR</b> IYLS <b>SH</b> FTMY                                                       | 60    |
| F9  | MATGVRAPVPGNENSLEIEELARFAVDEHNKKENALLEFVRVVKAKEQ <b>NRL</b> IYHS <b>D</b> VTMY                                                        | 60    |
| D6  | MATGVRAPVPGNENSLEIEELARFAVDEHNKKENALLEFVRVVKAKEQ <b>S</b> <b>R</b> <b>V</b> <b>I</b> <b>Y</b> <b>V</b> <b>L</b> <b>W</b> <b>F</b> TMY | 60    |
| H2  | MATGVRAPVPGNENSLEIEELARFAVDEHNKKENALLEFVRVVKAKEQ <b>LLG</b> TTV <b>Q</b> <b>C</b> MTMY                                                | 60    |
| G5  | MATGVRAPVPGNENSLEIEELARFAVDEHNKKENALLEFVRVVKAKEQ <b>R</b> <b>V</b> <b>F</b> <b>K</b> <b>I</b> <b>S</b> <b>G</b> <b>F</b> <b>E</b> TMY | 60    |
| B12 | MATGVRAPVPGNENSLEIEELARFAVDEHNKKENALLEFVRVVKAKEQ <b>K</b> <b>D</b> <b>F</b> <b>N</b> <b>V</b> <b>F</b> <b>G</b> <b>G</b> <b>E</b> TMY | 60    |
|     | *****                                                                                                                                 | ****  |
| B1  | LTLEAKDGGKKKLYEAKVWVK <b>RAMP</b> <b>SS</b> YFGNFKELQEFKPVGDA                                                                         |       |
| F9  | LTLEAKDGGKKKLYEAKVWVK <b>HAI</b> <b>P</b> <b>D</b> <b>S</b> <b>D</b> <b>F</b> <b>G</b> NFKELQEFKPVGDA                                 |       |
| D6  | LTLEAKDGGKKKLYEAKVWVK <b>H</b> <b>D</b> <b>S</b> <b>I</b> <b>C</b> <b>C</b> <b>N</b> <b>R</b> <b>I</b> NFKELQEFKPVGDA                 |       |
| H2  | LTLEAKDGGKKKLYEAKVWVK <b>RI</b> <b>C</b> <b>ND</b> <b>R</b> <b>H</b> <b>H</b> <b>V</b> NFKELQEFKPVGDA                                 |       |
| G5  | LTLEAKDGGKKKLYEAKVWVK <b>H</b> <b>N</b> <b>C</b> <b>I</b> <b>Y</b> <b>R</b> <b>D</b> <b>C</b> NFKELQEFKPVGDA                          |       |
| B12 | LTLEAKDGGKKKLYEAKVWVK <b>R</b> <b>N</b> <b>R</b> <b>I</b> <b>C</b> <b>R</b> <b>D</b> <b>C</b> HNFKELQEFKPVGDA                         |       |
|     | *****                                                                                                                                 | ***** |

Variable loops (2 no C, 4x2C)

**Figure S6.** Binding between G5-APEX and its cognate antigen SpyCatcher002 confirmed by gel filtration chromatography.

The elution profile of the G5-APEX Adhiron (double peak, grey) and of its cognate antigen SpyCatcher-mClover (single peak, peach) were compared with the profile of the complex (double peak, blue). The shift towards structures of larger mass is evident when ligand and antigen were loaded after pre-incubation.

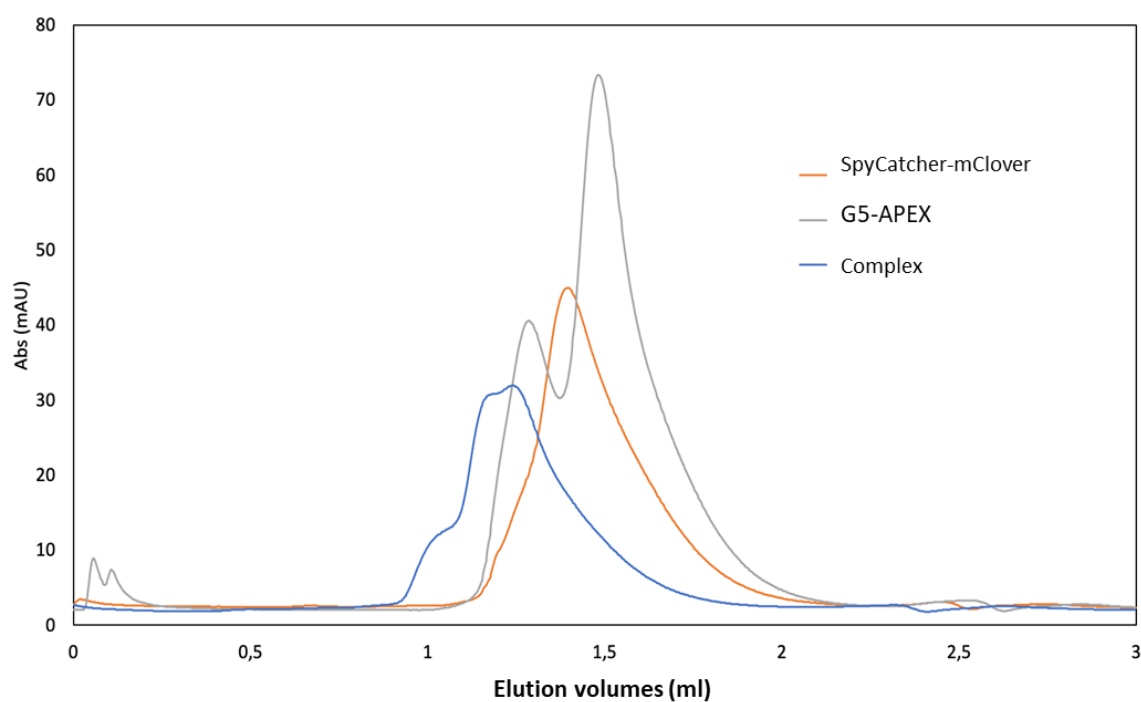

**Figure S7.** Affinity of G5 for SpyCatcher002 measured by chronoamperometry and fitted to Hill equation.

Affinity of G5 for SpyCatcher002 measured by chronoamperometry. Three sets of data were obtained for each of the two independent experiments, the one reported here (top panel) and the one shown in the main text (bottom panel) and the details are reported in the boxes.

### G5 $\alpha$ -SpyCatcher

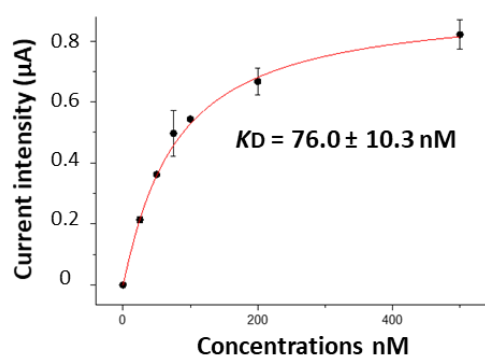

| Model           | Hill                                         |
|-----------------|----------------------------------------------|
| Equation        | $y = V_{\text{max}} \cdot x^n / (k^n + x^n)$ |
| Plot            | B                                            |
| Vmax            | $9.21359\text{E-}7 \pm 4.3896\text{E-}8$     |
| k               | $76.01593 \pm 10.2817$                       |
| n               | $1.07454 \pm 0.07928$                        |
| Reduced Chi-Sqr | 0.10072                                      |
| R-Square (COD)  | 0.99839                                      |
| Adj. R-Square   | 0.99758                                      |

| Model           | Hill                                         |
|-----------------|----------------------------------------------|
| Equation        | $y = V_{\text{max}} \cdot x^n / (k^n + x^n)$ |
| Plot            | B                                            |
| Vmax            | $2.36937\text{E-}6 \pm 2.07047\text{E-}8$    |
| k               | $85.91486 \pm 1.32573$                       |
| n               | $1.13409 \pm 0.02651$                        |
| Reduced Chi-Sqr | $2.21319\text{E-}17$                         |
| R-Square (COD)  | 0.99998                                      |
| Adj. R-Square   | 0.99996                                      |

**Figure S8.** Binding capacity of mono- and bivalent anti-SpyCatcher002 Adhiron constructs

The alternative fiber-optic-based SPR device with dip-in setting (White Fox - Fox Biosystems, Diepenbeek, Belgium) was used for comparing the binding capacity of monomeric (Top) and dimeric (via fusion to a rabbit Fc domain, Bottom) Adhiron constructs. Monovalent and bivalent Adhiron constructs were diluted in 10 mM PBS pH 7.2 containing 0.01% Tween-20 at concentrations in the range between 216 and 1.6 nM. SpyCatcher002 was resuspended in 10 mM NaAc pH 4.5 containing 0.01% Tween-20. Data were analyzed using the manufacturer's software with a one-to-one binding model.

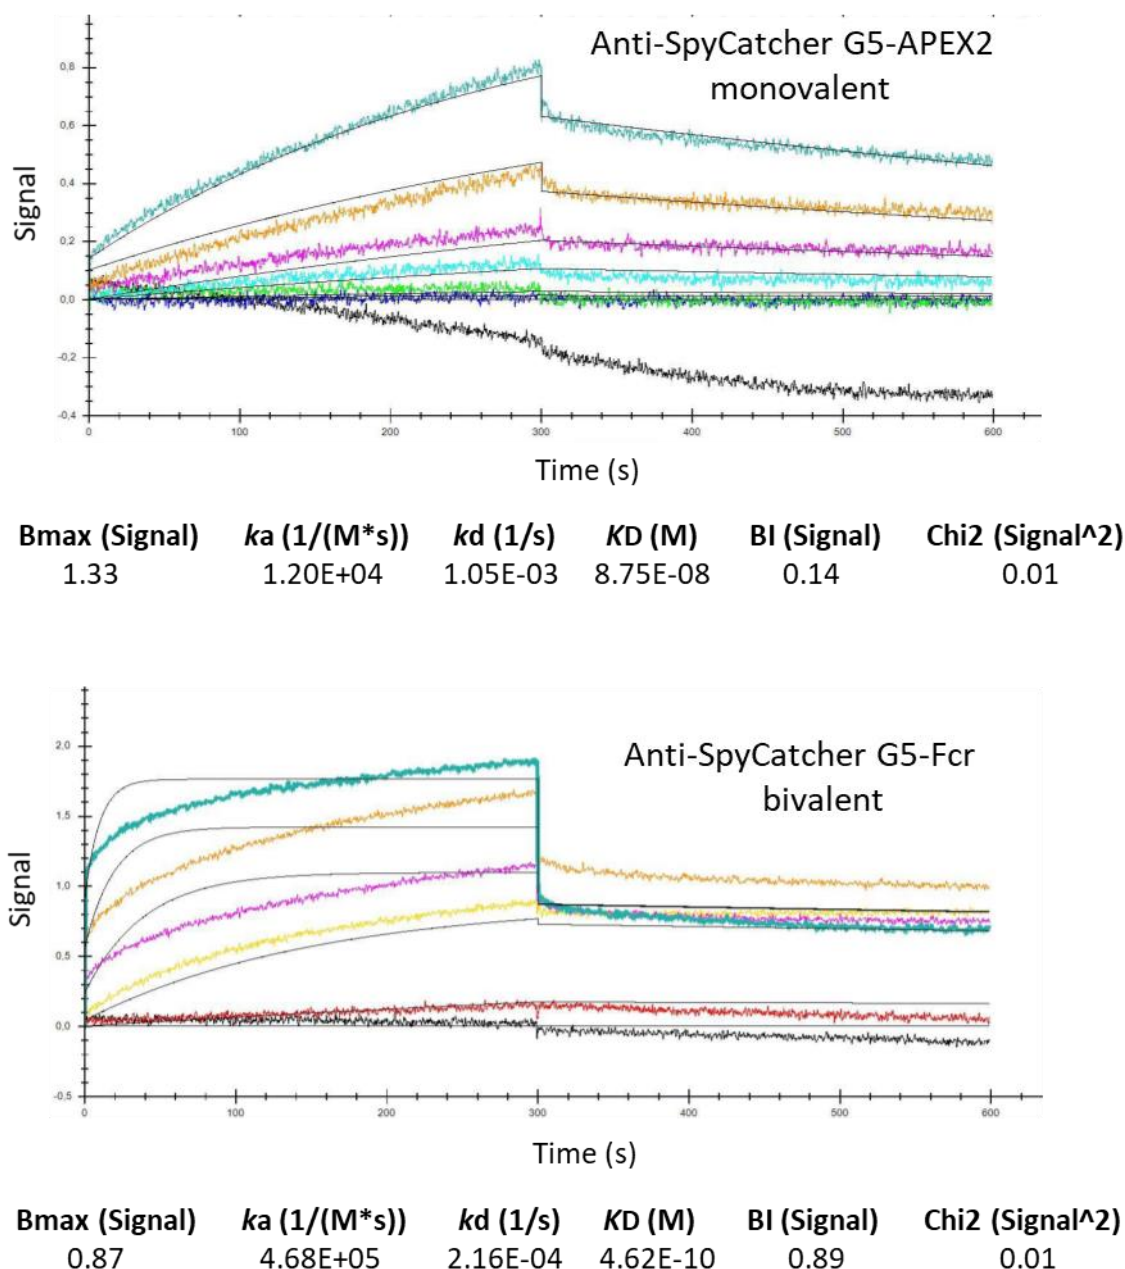



**Figure S9.** RBD-specific Adhiron

Clone selection was performed in triplicate by comparing the specific (anti-RBD) and unspecific (anti-BSA) signals of clones chosen according to the results of the preliminary screening (single repeat). Potential candidates (absorbance >500, irrelevant background) were tested together with negative controls (C1, D8, E9, E11, G5) to evaluate the reliability of the screening method.

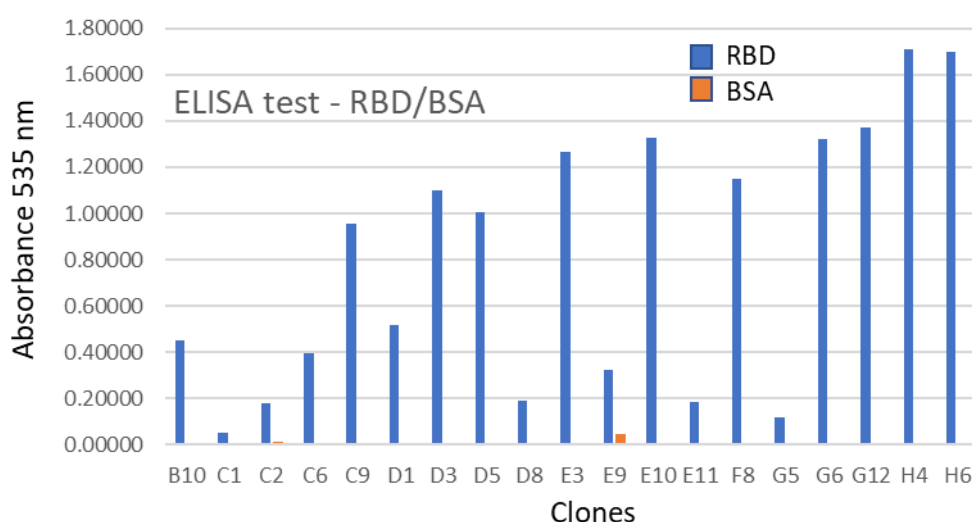

**Figure S10.** Heat-dependent Adhiron purification

The anti-CRP Adhiron B12-SpyTag and the Adhiron anti-SpyCatcher002 G5-cysTag were purified by inducing the precipitation of bacterial proteins via incubation of the bacterial supernatant at the indicated temperatures. Sample purity was analyzed by SDS-PAGE (top) and gel filtration (bottom). Protein mass was calculated according to the elution profile of calibration markers (Santa Cruz Biotechnology, Broad Range Markers, sc-2361).

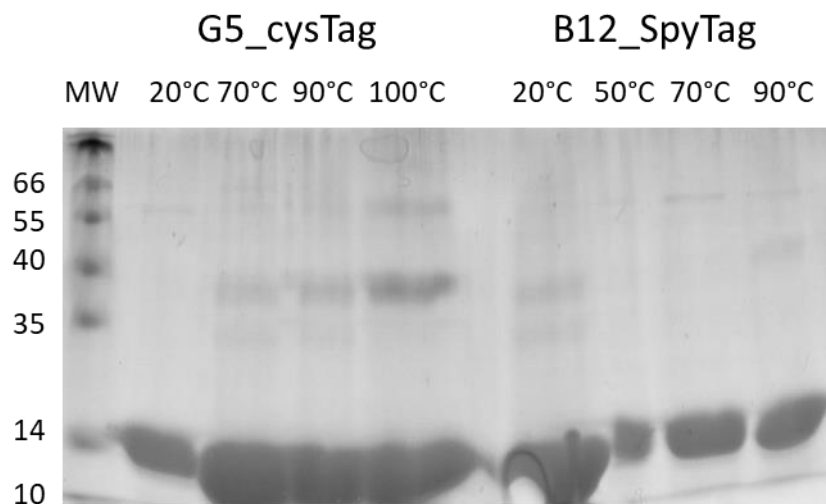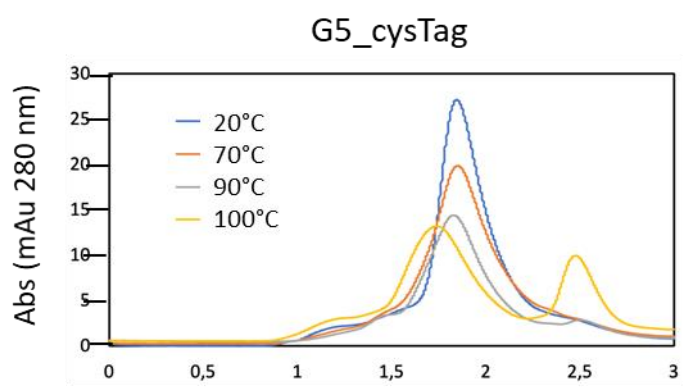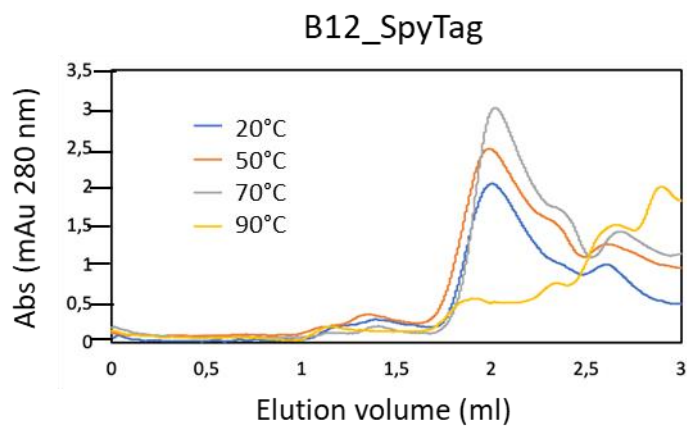

**Table S1.** Primers used for the Adhiron library preparation

Degenerated primers were used for hypermutating the two loops. In the loop 1, X denotes NNK codons with N = A/G/C/T and K = G/T, in the loop 2, Z stands for NDT; N = A/G/C/T, D = A/G/T. These combinations enable to encode R,N,D,C,G,H,I,L,F,S,Y,V amino acids.

| Primers    | Sequences                                       |
|------------|-------------------------------------------------|
| Fw loop 1  | 5'-CAAAGCAAAGAGCAAXXXXXXXXXXACGATGTATTATTAAC-3' |
| Rev loop 1 | 5'-CAAGGTCTGGGTAAAAXXXXXXXXXXAATTTAAGGAACT-3'   |
| Fw loop 2  | 5'-CAAAGCAAAGAGCAAZZZZZZZZACGATGTATTACTTAAC-3'  |
| Rev loop 2 | 5'-CAAGGTCTGGGTAAAZZZZZZZZAATTTAAGGAACTTC-3'    |

**Table S2.** Characteristics of different Adhiron-like scaffolds

Adh1 has been obtained grafting the CDR1 and CDR3 of the anti-HER2 nanobody A10 into the loops of a consensus Adhiron sequence, Adh2 grafting the CDR3 of the anti-HER2 nanobodies A10 and C8 in the same sequence, whereas in Adh3 the same sequences were cloned in an Adhiron sequence depleted of its N-terminus.

| Constructs | Yield (mg/ml) | K <sub>D</sub> (nM) |
|------------|---------------|---------------------|
| Adh1       | 11.6          | 36                  |
| Adh2       | 6             | 31                  |
| Adh3       | 12            | 0                   |

**Table S3.** Unique anti-CRP Adhiron clones selected by fluorescence-based ELISA

Fluorescent signals obtained using SpyCatcher-mClover3 in combination with the SpyTag fused to Adhiron were measured at 535 nm. The results are the mean of three measurements. BSA was used for coating.

| Clone      | CRP       | BSA    |
|------------|-----------|--------|
| <b>A9</b>  | 951±49    | 88±7   |
| <b>B5</b>  | 636±61    | 68±8   |
| <b>E5</b>  | 1,467±89  | 71±4   |
| <b>E7</b>  | 2,189±86  | 105±11 |
| <b>E8</b>  | 773±27    | 120±9  |
| <b>F5</b>  | 1,176±92  | 87±10  |
| <b>F11</b> | 4,960±106 | 185±13 |
| <b>G6</b>  | 2,104±77  | 279±27 |
| <b>G8</b>  | 4,611±211 | 116±6  |
| <b>G9</b>  | 1,587±59  | 138±21 |

**Table S4.** Unique anti-SpyCatcher002 Adhiron clones selected by phage ELISA

Specific signals obtained with SpyCatcher002-mClover3 were compared with those obtained using a mClover fusion construct and the coating agent BSA. The results are the mean of three measurements.

| Clones     | SpyCatcher002-mClover3 | A10 mClover3 | BSA  |
|------------|------------------------|--------------|------|
| <b>B1</b>  | 1,159±89               | 10±1         | 16±2 |
| <b>B12</b> | 580±29                 | 17±1         | 10±2 |
| <b>D6</b>  | 1,507±104              | 111±12       | 26±3 |
| <b>F9</b>  | 1,578±53               | 12±2         | 10±1 |
| <b>G5</b>  | 1,520±74               | 23±4         | 24±2 |
| <b>H2</b>  | 785±49                 | 20±1         | 11±1 |

**Table S5.** Buffer optimization allows the increase of the construct T<sub>m</sub>

The construct B12-SpyTag was resuspended in different buffers and the samples underwent DSF to determine their T<sub>m</sub> values. The highest and lowest combinations are highlighted in red.

| Buffer conditions          | T <sub>m</sub> (°C) |
|----------------------------|---------------------|
| pH 6.5                     | 76.2                |
| pH 6.5 + NaCl              | 76.4                |
| pH 6.5 + NaCl + DTT        | 75.3                |
| pH 6.5 +NaCl + EDTA        | 75.8                |
| pH 7.4                     | 78.2                |
| pH 7.4 + NaCl              | 77.5                |
| <b>pH 7.4 + NaCl + DTT</b> | <b>79.8</b>         |
| pH 7.4 +NaCl + EDTA        | 77.1                |
| pH 8.5                     | 74.2                |
| <b>pH 8.5 + NaCl</b>       | <b>74.2</b>         |
| pH 8.5 + NaCl + DTT        | 76.2                |
| pH 8.5 +NaCl + EDTA        | 76.1                |
